# Supplementary material for: The Incumbent Firm’s Response to Market Encroachment: Strategic Deterrence under the Reference Price Effects
Source: Research Square preprint supplement (doi:10.21203/rs.3.rs-7429710/v1), 2025-10-30
Supplement: Supplementary file 1 [file 69f314695c5426960da485a5.docx]

**Appendix**

**A.1 Strategy  is infeasible**

Substituting  into  with condition , and letting , we can derive the following by rearranging :

,

where.

The conditonholds universally when the following two inequalities are jointly satisfied:

Since both inequalities hold universally within the assumed parameter space, the resulting condition contradicts our model's core assumptions. Consequently, **Strategy**  is non-implementable.

**A.2 Proof of** **Lemma 1.**

Substitutingandinto , and rearranging yields:

That is, when,the incumbent firm adopts **Strategy**  in equilibrium.

Substituting into , where ,the collation yields:.That is, when , the incumbent firm adopts **Strategy** .

When the conditionholds, let, which implies . Consequently, we derive, under which the incumbent firm adopts **Strategy**  in equilibrium.

**A.3 Proof of** **Proposition 1.**

Substituting Equation (9) into Equation (13) reveals that is a concave function of ,so that we can obtain. **Lemma 1** implies that the following conditions must be satisfied under **Strategy** .Comparing and , we establish that:

(i) Under the condition , where , is monotonically decreasing within the domain, consequently yielding ;

(ii) Under the condition, where, we obtain .

**A.4 Proof of** **Proposition 2.**

Substituting (11) into (15) establishes the concavity ofwith respect to, from which we derive the optimal pricing in Period 1. **Lemma 1** implies that the condition must be satisfied under **Strategy**. We can perform comparative statics between and , identifying two distinct cases:

(i) Under the condition ,where , we obtain ;

(ii) Under the condition ,where, is monotonically increasing within the domain, consequently yielding .

**A.5 Proof of** **Proposition 3.**

Building upon **Proposition 1 and Proposition 2**, we compare the incumbent firm’s profits across three distinct scenarios:


Imposing and solving optimization problem , we establish that exhibits strict monotonic increasing behavior with .Consequently, it follows directly that bothandhold, which guarantees the existence of such thatis satisfied. Therefore, whenobtains, conditionnecessarily follows, implying . Whileobtains, conditionfollows, implying.


**Proposition 1 and Proposition 2** jointly imply that the incumbent firm’s pricing in Period 1 remains identical under both **Strategy** and **Strategy** in this scenario, thus establishing .

(3)

Sinceholds universally in, the incumbent firm’s optimal pricing in Period 1 is given by .
